# Supplementary material for: Interstitial lung disease and wedge resection are poor prognostic factors for non-small cell lung cancer
Source: PubMed Central journal article supplement — J Thorac Dis. 2022 Apr;14(4):1052–60. doi: 10.21037/jtd-21-1757 (PMC9096310; doi:10.21037/jtd-21-1757), 2022-04
Supplement: jtd-14-04-1052-dss.pdf [file jtd-14-04-1052-dss.pdf]

## Data Sharing Statement

|                     |                                                                                                                                                    |                                                                                                    |
|---------------------|----------------------------------------------------------------------------------------------------------------------------------------------------|----------------------------------------------------------------------------------------------------|
| <b>Article Info</b> | <a href="https://dx.doi.org/10.21037/jtd-21-1757">https://dx.doi.org/10.21037/jtd-21-1757</a>                                                      |                                                                                                    |
| <b>Item</b>         | <b>Question</b>                                                                                                                                    | <b>Authors' Response<br/>(place "-" if not applicable)</b>                                         |
| 1                   | Would you like to share data collected for your study to others?                                                                                   | Yes.                                                                                               |
| 2                   | If not, would you like to share the reason for your decision?                                                                                      | -                                                                                                  |
| 3                   | What data in particular will be shared?                                                                                                            | The survival data in particular will be shared.                                                    |
| 4                   | Any other documents will be share? Such as study protocol, statistical analysis plan, informed consent form, clinical study report, analytic code. | Statistical analysis plan also be shared if requested.                                             |
| 5                   | When will data availability begin?                                                                                                                 | From the publication date.                                                                         |
| 6                   | When will data availability end?                                                                                                                   | Two years within the publication data.                                                             |
| 7                   | To whom will you share the data?                                                                                                                   | Medical oncologist.                                                                                |
| 8                   | For what type of analysis or purpose?                                                                                                              | For analysis to evaluate the prognostic factors in NSCLC patients.                                 |
| 9                   | How or where can the data/documents be obtained?                                                                                                   | E-mail could be sent to the address below to obtain the shared data:<br>motono@kanazawa-med.ac.jp. |
| 10                  | Any other restrictions?                                                                                                                            | No.                                                                                                |
